# Supplementary figures and images for: Allometric Scaling of Calcaneal Bone Stiffness in Young Athletes: An Exploratory Study of a Size-Free Index
Source: Research Square preprint supplement (doi:10.21203/rs.3.rs-8285227/v1), 2026-01-08

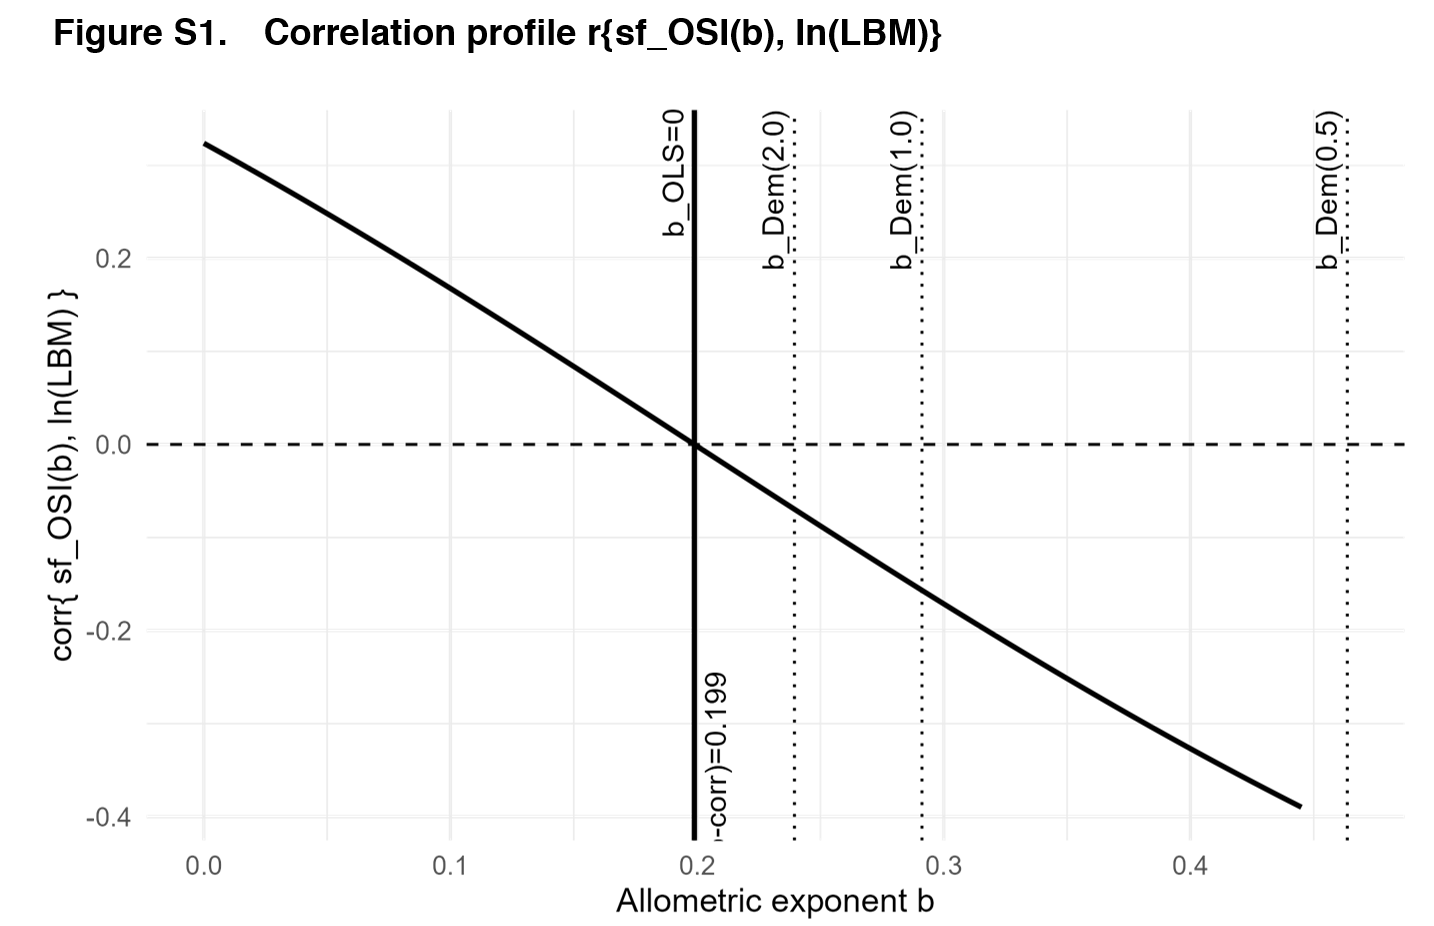

Supplement: Supplementary file 1 [file ddb0bc29da6a08cd04da6650.docx]
